# Supplementary material for: Cortical Mechanisms of Visual Hypersensitivity in Women at Risk for Chronic Pelvic Pain
Source: PubMed Central journal article supplement (PMC7836135; doi:10.1101/2020.12.03.20242032), 2021-01-18
Supplement: media-1.pdf [file media-1.pdf]

## Supplementary Material

This document contains the complete supplementary material, including both figures and tables, as referenced in the paper:

Kmiecik, M. J., Tu, F. F., Sifton, R. L., Dillane, K. E., Roth, G. E., Harte, S. E., & Hellman, K. M. (2020). Cortical Mechanisms of Visual Hypersensitivity in Women at Risk for Chronic Pelvic Pain. (*full citation appears here*).

Figures and tables begin on the next page, with each display item on its own page.

Supplementary Table 1

*Analysis 2 Regression Coefficient Explanations and Result Summary*

| Parameter                 |                                |                                                                                                              |                                 |                                       |
|---------------------------|--------------------------------|--------------------------------------------------------------------------------------------------------------|---------------------------------|---------------------------------------|
| Level One                 | Level Two                      | Explanation                                                                                                  | Electrode                       | Result                                |
| Intercept $b_{0i}$        | Intercept $\gamma_{00}$        | Grand average unpleasantness ratings                                                                         | All                             | $M = 8$ ,<br>$p < .001$               |
|                           | Menstrual Pain $\gamma_{01}$   | Association between menstrual pain and unpleasantness                                                        | All                             | $ns$                                  |
|                           | Somatic Symptoms $\gamma_{02}$ | Association between somatic symptoms and unpleasantness                                                      | All                             | $ns$                                  |
| Brightness Slope $b_{1i}$ | Bladder Pain $\gamma_{03}$     | *Association between bladder pain and unpleasantness                                                         | All                             | $\eta_p^2 = .06$ ,<br>$p = .003$      |
|                           | Intercept $\gamma_{10}$        | *Association between brightness intensity and unpleasantness                                                 | Oz                              | $\eta_p^2 = .17$ ,<br>$p < .001$      |
|                           | Menstrual Pain $\gamma_{11}$   | Impact of prior menstrual pain on the association between brightness intensity and unpleasantness            | Oz                              | $\eta_p^2 = .03$ ,<br>$p = .03$       |
|                           | Somatic Symptoms $\gamma_{12}$ | Impact of prior somatic symptoms on the association between brightness intensity and unpleasantness          | Oz                              | $ns$                                  |
|                           | Bladder Pain $\gamma_{13}$     | Impact of prior experimental bladder pain on the association between unpleasantness and brightness intensity | CP6                             | $\eta_p^2 = .09$ ,<br>$p_{fdr} = .01$ |
| PSD Slope $b_{2i}$        | Intercept $\gamma_{20}$        | *How cortical excitability impacts subsequent report of visual unpleasantness                                | Oz                              | $\eta_p^2 = .07$ ,<br>$p = .002$      |
|                           | Menstrual Pain $\gamma_{21}$   | How prior menstrual pain impacts the association between cortical excitability and unpleasantness            | Oz                              | $ns$                                  |
|                           | Somatic Symptoms $\gamma_{22}$ | How prior somatic symptoms impact the association between cortical excitability and unpleasantness           | Oz                              | $ns$                                  |
|                           |                                |                                                                                                              | CP1                             | $\eta_p^2 = .06$ ,<br>$p_{fdr} = .04$ |
|                           | Bladder Pain $\gamma_{23}$     | *How bladder pain affects the association between cortical excitability and unpleasantness                   | CP6                             | $\eta_p^2 = .08$ ,<br>$p_{fdr} = .02$ |
|                           |                                | Oz                                                                                                           | $\eta_p^2 = .03$ ,<br>$p = .03$ |                                       |

*Note.* Unpleasantness refers to ratings of visual unpleasantness during the visual task.  $ns$  = not significant;  $fdr$  = false discovery rate; \* denotes contrasts pertinent to study's primary hypotheses.

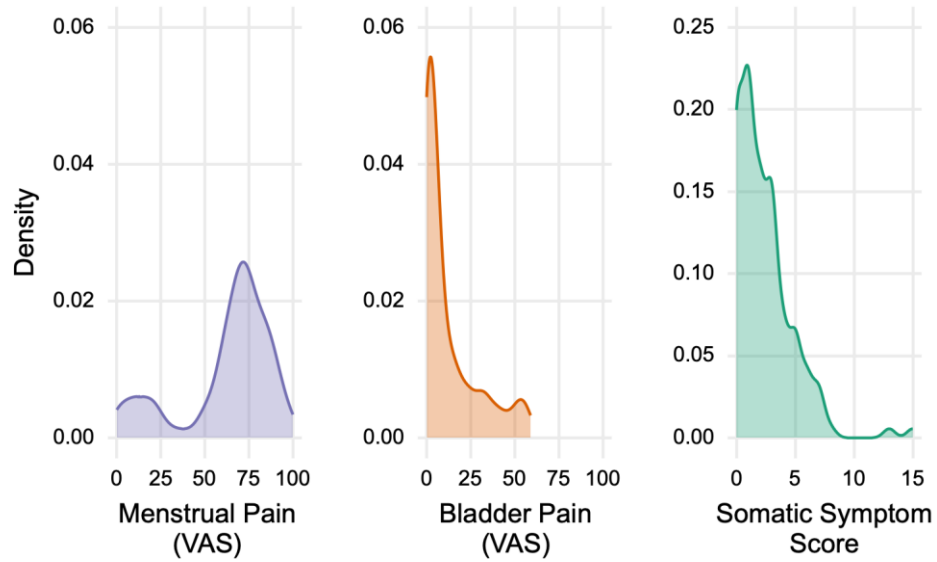

*Supplementary Figure 1. Density plots of moderating pain and somatic symptom variables in second level regression models.* The participants had a wide range of menstrual pain, bladder pain, and somatic symptom scores amenable for regression modeling. Y-axis (density) represents the concentration of points about a continuous x-axis measure. VAS = visual analog scale (0 – no pain, 100 – worst pain imaginable).

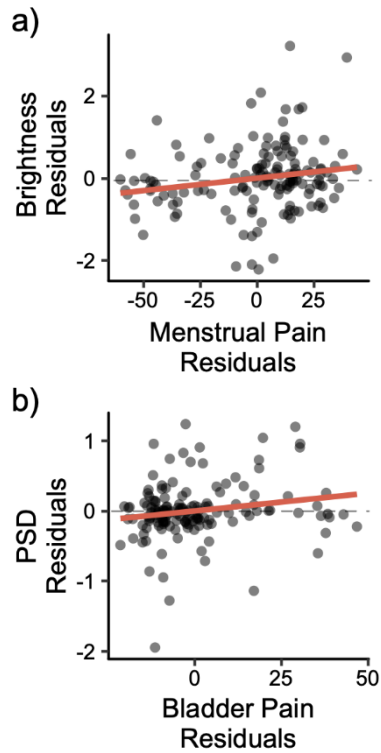

*Supplementary Figure 2. Partial regression (added variable) scatter plots depicting the moderating relationship between (a) menstrual pain and brightness slopes [b<sub>1</sub>] and (b) bladder pain and PSD slopes [b<sub>2</sub>] at electrode Oz. These plots depict the unique relationship between the moderating variable (x-axis) and the dependent variable (y-axis) after accounting for the other predictors in the second level models. PSD = power spectral density (25Hz).*

Supplementary Table 2

*Analysis 1 Electrode-wise Multilevel Modeling Results: Predicting Power Spectral Density as a Function of Increasing Brightness*

| Electrode | Source     | <i>b</i> | 95% CI    |           | <i>SE</i> | <i>SS</i> | <i>MSE</i> | <i>F</i> | $\eta_p^2$ |
|-----------|------------|----------|-----------|-----------|-----------|-----------|------------|----------|------------|
|           |            |          | <i>LL</i> | <i>UL</i> |           |           |            |          |            |
| C3        | Intercept  | -33.05   | -33.74    | -32.35    | 0.35      | 160549.52 | 18.14      | 8849.72  | 0.98       |
| C3        | Brightness | 0.30     | 0.21      | 0.40      | 0.05      | 13.56     | 0.35       | 38.94    | 0.21       |
| C4        | Intercept  | -32.93   | -33.64    | -32.21    | 0.36      | 159368.39 | 19.08      | 8350.83  | 0.98       |
| C4        | Brightness | 0.40     | 0.29      | 0.51      | 0.05      | 23.71     | 0.43       | 55.05    | 0.27       |
| CP1       | Intercept  | -31.87   | -32.39    | -31.35    | 0.26      | 149306.67 | 10.31      | 14478.54 | 0.99       |
| CP1       | Brightness | 0.84     | 0.73      | 0.95      | 0.06      | 103.96    | 0.48       | 217.22   | 0.60       |
| CP2       | Intercept  | -32.02   | -32.53    | -31.51    | 0.26      | 150694.86 | 9.81       | 15358.13 | 0.99       |
| CP2       | Brightness | 0.79     | 0.68      | 0.89      | 0.05      | 90.88     | 0.42       | 215.55   | 0.60       |
| CP5       | Intercept  | -32.39   | -33.03    | -31.74    | 0.32      | 154180.99 | 15.52      | 9934.66  | 0.99       |
| CP5       | Brightness | 0.82     | 0.68      | 0.95      | 0.07      | 98.07     | 0.67       | 145.77   | 0.50       |
| CP6       | Intercept  | -31.35   | -32.10    | -30.59    | 0.38      | 144443.06 | 21.31      | 6777.57  | 0.98       |
| CP6       | Brightness | 1.13     | 0.99      | 1.27      | 0.07      | 187.01    | 0.74       | 252.54   | 0.63       |
| Cz        | Intercept  | -31.58   | -32.14    | -31.02    | 0.28      | 146617.93 | 11.77      | 12453.33 | 0.99       |
| Cz        | Brightness | 0.59     | 0.47      | 0.70      | 0.06      | 50.42     | 0.47       | 107.91   | 0.42       |
| F3        | Intercept  | -33.44   | -34.10    | -32.78    | 0.33      | 164362.99 | 16.48      | 9971.85  | 0.99       |
| F3        | Brightness | 0.28     | 0.19      | 0.37      | 0.04      | 11.52     | 0.27       | 42.04    | 0.22       |
| F4        | Intercept  | -33.55   | -34.20    | -32.90    | 0.33      | 165465.80 | 16.06      | 10305.60 | 0.99       |
| F4        | Brightness | 0.37     | 0.28      | 0.47      | 0.05      | 20.66     | 0.31       | 67.19    | 0.32       |
| F7        | Intercept  | -33.60   | -34.21    | -32.99    | 0.31      | 165957.25 | 13.81      | 12021.46 | 0.99       |
| F7        | Brightness | 0.46     | 0.36      | 0.56      | 0.05      | 30.84     | 0.37       | 82.58    | 0.36       |
| F8        | Intercept  | -33.94   | -34.52    | -33.36    | 0.29      | 169314.79 | 12.64      | 13394.94 | 0.99       |
| F8        | Brightness | 0.45     | 0.36      | 0.54      | 0.05      | 30.15     | 0.30       | 98.95    | 0.40       |

|      |            |        |        |        |      |           |       |          |      |
|------|------------|--------|--------|--------|------|-----------|-------|----------|------|
| FC1  | Intercept  | -33.15 | -33.64 | -32.67 | 0.25 | 161586.36 | 8.96  | 18026.62 | 0.99 |
| FC1  | Brightness | 0.30   | 0.21   | 0.38   | 0.04 | 13.00     | 0.27  | 48.78    | 0.25 |
| FC2  | Intercept  | -33.42 | -33.98 | -32.87 | 0.28 | 164216.73 | 11.70 | 14037.12 | 0.99 |
| FC2  | Brightness | 0.38   | 0.30   | 0.47   | 0.04 | 21.32     | 0.27  | 77.72    | 0.35 |
| FC5  | Intercept  | -36.39 | -37.06 | -35.72 | 0.34 | 194656.75 | 16.69 | 11666.25 | 0.99 |
| FC5  | Brightness | 0.43   | 0.33   | 0.52   | 0.05 | 26.58     | 0.31  | 86.56    | 0.37 |
| FC6  | Intercept  | -35.96 | -36.56 | -35.36 | 0.30 | 190124.92 | 13.55 | 14028.22 | 0.99 |
| FC6  | Brightness | 0.57   | 0.47   | 0.67   | 0.05 | 47.46     | 0.39  | 120.74   | 0.45 |
| Fp1  | Intercept  | -33.59 | -34.28 | -32.91 | 0.34 | 165899.40 | 17.46 | 9500.04  | 0.98 |
| Fp1  | Brightness | 0.71   | 0.59   | 0.83   | 0.06 | 73.90     | 0.56  | 132.13   | 0.48 |
| Fp2  | Intercept  | -33.85 | -34.51 | -33.19 | 0.33 | 168419.31 | 16.37 | 10290.52 | 0.99 |
| Fp2  | Brightness | 0.69   | 0.56   | 0.83   | 0.07 | 70.26     | 0.68  | 103.83   | 0.42 |
| FT10 | Intercept  | -34.05 | -34.57 | -33.53 | 0.26 | 170412.26 | 10.19 | 16727.84 | 0.99 |
| FT10 | Brightness | 0.61   | 0.49   | 0.73   | 0.06 | 54.89     | 0.51  | 108.27   | 0.43 |
| FT9  | Intercept  | -33.19 | -33.69 | -32.69 | 0.26 | 161930.75 | 9.58  | 16900.83 | 0.99 |
| FT9  | Brightness | 0.50   | 0.40   | 0.60   | 0.05 | 36.83     | 0.39  | 94.05    | 0.39 |
| Fz   | Intercept  | -32.53 | -32.99 | -32.06 | 0.23 | 155525.37 | 8.06  | 19300.29 | 0.99 |
| Fz   | Brightness | 0.29   | 0.21   | 0.37   | 0.04 | 12.23     | 0.24  | 50.19    | 0.26 |
| O1   | Intercept  | -26.04 | -26.83 | -25.25 | 0.40 | 99674.02  | 23.37 | 4264.77  | 0.97 |
| O1   | Brightness | 1.51   | 1.35   | 1.66   | 0.08 | 333.19    | 0.86  | 386.08   | 0.73 |
| O2   | Intercept  | -25.24 | -26.19 | -24.28 | 0.48 | 93641.62  | 34.36 | 2725.20  | 0.95 |
| O2   | Brightness | 1.74   | 1.57   | 1.91   | 0.09 | 446.71    | 1.09  | 410.68   | 0.74 |
| Oz   | Intercept  | -23.76 | -24.68 | -22.84 | 0.47 | 82992.47  | 31.92 | 2600.06  | 0.95 |
| Oz   | Brightness | 2.05   | 1.87   | 2.23   | 0.09 | 617.64    | 1.22  | 504.68   | 0.78 |
| P3   | Intercept  | -28.91 | -29.57 | -28.26 | 0.33 | 122874.54 | 16.20 | 7583.54  | 0.98 |
| P3   | Brightness | 1.08   | 0.93   | 1.22   | 0.07 | 170.46    | 0.82  | 207.32   | 0.59 |
| P4   | Intercept  | -27.08 | -27.83 | -26.33 | 0.38 | 107831.97 | 21.16 | 5096.26  | 0.97 |
| P4   | Brightness | 1.18   | 1.04   | 1.32   | 0.07 | 203.70    | 0.72  | 283.55   | 0.66 |

|      |            |        |        |        |      |           |       |         |      |
|------|------------|--------|--------|--------|------|-----------|-------|---------|------|
| P7   | Intercept  | -28.41 | -29.16 | -27.66 | 0.38 | 118621.46 | 21.12 | 5617.08 | 0.97 |
| P7   | Brightness | 1.40   | 1.25   | 1.56   | 0.08 | 289.50    | 0.87  | 331.65  | 0.69 |
| P8   | Intercept  | -27.23 | -28.02 | -26.44 | 0.40 | 109028.88 | 23.47 | 4646.25 | 0.97 |
| P8   | Brightness | 1.35   | 1.20   | 1.50   | 0.08 | 269.01    | 0.84  | 321.58  | 0.69 |
| Pz   | Intercept  | -27.99 | -28.68 | -27.31 | 0.35 | 115184.29 | 17.76 | 6484.82 | 0.98 |
| Pz   | Brightness | 0.99   | 0.83   | 1.14   | 0.08 | 143.36    | 0.89  | 160.59  | 0.52 |
| T7   | Intercept  | -32.69 | -33.35 | -32.03 | 0.34 | 157068.91 | 16.51 | 9512.60 | 0.98 |
| T7   | Brightness | 0.59   | 0.48   | 0.70   | 0.06 | 50.65     | 0.45  | 111.63  | 0.43 |
| T8   | Intercept  | -33.08 | -33.73 | -32.42 | 0.33 | 160826.65 | 16.17 | 9946.21 | 0.99 |
| T8   | Brightness | 0.81   | 0.68   | 0.93   | 0.06 | 95.44     | 0.62  | 155.18  | 0.52 |
| TP10 | Intercept  | -30.83 | -31.54 | -30.11 | 0.36 | 139682.32 | 19.46 | 7178.68 | 0.98 |
| TP10 | Brightness | 1.26   | 1.11   | 1.42   | 0.08 | 233.98    | 0.91  | 258.47  | 0.64 |
| TP9  | Intercept  | -31.11 | -31.78 | -30.43 | 0.34 | 142226.41 | 17.32 | 8213.65 | 0.98 |
| TP9  | Brightness | 0.91   | 0.77   | 1.05   | 0.07 | 122.67    | 0.75  | 164.05  | 0.53 |

*Note.* Both FDR corrected and uncorrected  $p$  values were  $< .001$ ;  $df$  for the numerator and denominator were 1 and 46, respectively; LL = lower level; UL = upper level.

Supplementary Table 3

*Analysis 2 Electrode-wise Multilevel Modeling Results: Estimating Brain-Behavior Relationships and the Moderating Effects of Pain and Somatic Symptoms*

| Electrode | Model      | Source           | <i>b</i> | 95% CI    |           | <i>SE</i> | <i>SS</i> | <i>MSE</i> | <i>F</i> | <i>p</i> | <i>p<sub>fdr</sub></i> | $\eta_p^2$ |
|-----------|------------|------------------|----------|-----------|-----------|-----------|-----------|------------|----------|----------|------------------------|------------|
|           |            |                  |          | <i>LL</i> | <i>UL</i> |           |           |            |          |          |                        |            |
| All       | Intercept  | Intercept        | 7.997    | 7.367     | 8.627     | 0.319     | 9401.60   | 14.92      | 630.0    | < .001   | < .001                 | .815       |
| All       | Intercept  | Bladder Pain     | 0.064    | 0.022     | 0.107     | 0.021     | 134.33    | 14.92      | 9.0      | .003     | .003                   | .059       |
| All       | Intercept  | Menstrual Pain   | 0.012    | -0.013    | 0.038     | 0.013     | 13.99     | 14.92      | 0.9      | .335     | .335                   | .007       |
| All       | Intercept  | Somatic Symptoms | -0.135   | -0.411    | 0.140     | 0.139     | 14.13     | 14.92      | 0.9      | .332     | .332                   | .007       |
| C3        | Brightness | Intercept        | 0.559    | 0.411     | 0.706     | 0.075     | 45.92     | 0.82       | 56.1     | < .001   | < .001                 | .282       |
| C3        | Brightness | Bladder Pain     | 0.000    | -0.010    | 0.010     | 0.005     | 0.00      | 0.82       | 0.0      | .985     | .985                   | < .001     |
| C3        | Brightness | Menstrual Pain   | 0.005    | -0.001    | 0.011     | 0.003     | 2.35      | 0.82       | 2.9      | .093     | .153                   | .02        |
| C3        | Brightness | Somatic Symptoms | -0.028   | -0.093    | 0.036     | 0.033     | 0.61      | 0.82       | 0.7      | .389     | .817                   | .005       |
| C4        | Brightness | Intercept        | 0.451    | 0.297     | 0.606     | 0.078     | 29.96     | 0.90       | 33.4     | < .001   | < .001                 | .189       |
| C4        | Brightness | Bladder Pain     | -0.005   | -0.015    | 0.005     | 0.005     | 0.82      | 0.90       | 0.9      | .34      | .985                   | .006       |
| C4        | Brightness | Menstrual Pain   | 0.006    | 0.000     | 0.012     | 0.003     | 3.40      | 0.90       | 3.8      | .054     | .132                   | .026       |
| C4        | Brightness | Somatic Symptoms | -0.053   | -0.121    | 0.014     | 0.034     | 2.18      | 0.90       | 2.4      | .121     | .58                    | .017       |
| CP1       | Brightness | Intercept        | 0.492    | 0.351     | 0.633     | 0.071     | 35.61     | 0.75       | 47.7     | < .001   | < .001                 | .25        |
| CP1       | Brightness | Bladder Pain     | -0.002   | -0.011    | 0.008     | 0.005     | 0.10      | 0.75       | 0.1      | .717     | .985                   | .001       |
| CP1       | Brightness | Menstrual Pain   | 0.005    | -0.001    | 0.010     | 0.003     | 1.99      | 0.75       | 2.7      | .105     | .153                   | .018       |
| CP1       | Brightness | Somatic Symptoms | 0.013    | -0.048    | 0.075     | 0.031     | 0.14      | 0.75       | 0.2      | .669     | .93                    | .001       |
| CP2       | Brightness | Intercept        | 0.448    | 0.256     | 0.640     | 0.097     | 29.50     | 1.38       | 21.3     | < .001   | < .001                 | .13        |
| CP2       | Brightness | Bladder Pain     | 0.001    | -0.012    | 0.014     | 0.007     | 0.01      | 1.38       | 0.0      | .926     | .985                   | < .001     |
| CP2       | Brightness | Menstrual Pain   | 0.008    | 0.001     | 0.016     | 0.004     | 6.26      | 1.38       | 4.5      | .035     | .126                   | .031       |
| CP2       | Brightness | Somatic Symptoms | -0.078   | -0.162    | 0.006     | 0.042     | 4.71      | 1.38       | 3.4      | .067     | .535                   | .023       |
| CP5       | Brightness | Intercept        | 0.434    | 0.262     | 0.606     | 0.087     | 27.64     | 1.11       | 24.8     | < .001   | < .001                 | .148       |
| CP5       | Brightness | Bladder Pain     | 0.002    | -0.010    | 0.013     | 0.006     | 0.09      | 1.11       | 0.1      | .78      | .985                   | .001       |
| CP5       | Brightness | Menstrual Pain   | 0.004    | -0.003    | 0.011     | 0.004     | 1.55      | 1.11       | 1.4      | .239     | .278                   | .01        |



|     |            |                  |        |        |        |       |       |      |      |        |        |        |
|-----|------------|------------------|--------|--------|--------|-------|-------|------|------|--------|--------|--------|
| CP5 | Brightness | Somatic Symptoms | -0.029 | -0.104 | 0.046  | 0.038 | 0.64  | 1.11 | 0.6  | .448   | .843   | .004   |
| CP6 | Brightness | Intercept        | 0.428  | 0.240  | 0.617  | 0.095 | 26.96 | 1.34 | 20.2 | < .001 | < .001 | .124   |
| CP6 | Brightness | Bladder Pain     | 0.005  | -0.007 | 0.018  | 0.006 | 0.96  | 1.34 | 0.7  | .398   | .985   | .005   |
| CP6 | Brightness | Menstrual Pain   | 0.006  | -0.001 | 0.014  | 0.004 | 3.71  | 1.34 | 2.8  | .098   | .153   | .019   |
| CP6 | Brightness | Somatic Symptoms | -0.157 | -0.239 | -0.074 | 0.042 | 18.87 | 1.34 | 14.1 | < .001 | .008   | .09    |
| Cz  | Brightness | Intercept        | 0.481  | 0.333  | 0.629  | 0.075 | 33.98 | 0.82 | 41.2 | < .001 | < .001 | .224   |
| Cz  | Brightness | Bladder Pain     | -0.002 | -0.012 | 0.008  | 0.005 | 0.09  | 0.82 | 0.1  | .747   | .985   | .001   |
| Cz  | Brightness | Menstrual Pain   | 0.004  | -0.002 | 0.010  | 0.003 | 1.63  | 0.82 | 2.0  | .162   | .215   | .014   |
| Cz  | Brightness | Somatic Symptoms | -0.018 | -0.083 | 0.046  | 0.033 | 0.25  | 0.82 | 0.3  | .579   | .896   | .002   |
| F3  | Brightness | Intercept        | 0.562  | 0.423  | 0.700  | 0.070 | 46.37 | 0.72 | 64.2 | < .001 | < .001 | .31    |
| F3  | Brightness | Bladder Pain     | -0.001 | -0.010 | 0.009  | 0.005 | 0.01  | 0.72 | 0.0  | .913   | .985   | < .001 |
| F3  | Brightness | Menstrual Pain   | 0.009  | 0.003  | 0.014  | 0.003 | 6.70  | 0.72 | 9.3  | .003   | .089   | .061   |
| F3  | Brightness | Somatic Symptoms | -0.008 | -0.068 | 0.053  | 0.031 | 0.04  | 0.72 | 0.1  | .804   | .934   | < .001 |
| F4  | Brightness | Intercept        | 0.485  | 0.357  | 0.613  | 0.065 | 34.58 | 0.62 | 56.1 | < .001 | < .001 | .282   |
| F4  | Brightness | Bladder Pain     | 0.002  | -0.006 | 0.011  | 0.004 | 0.16  | 0.62 | 0.3  | .61    | .985   | .002   |
| F4  | Brightness | Menstrual Pain   | 0.005  | 0.000  | 0.010  | 0.003 | 2.15  | 0.62 | 3.5  | .064   | .134   | .024   |
| F4  | Brightness | Somatic Symptoms | -0.032 | -0.088 | 0.024  | 0.028 | 0.79  | 0.62 | 1.3  | .259   | .723   | .009   |
| F7  | Brightness | Intercept        | 0.515  | 0.363  | 0.667  | 0.077 | 39.00 | 0.87 | 44.7 | < .001 | < .001 | .238   |
| F7  | Brightness | Bladder Pain     | 0.007  | -0.004 | 0.017  | 0.005 | 1.43  | 0.87 | 1.6  | .203   | .985   | .011   |
| F7  | Brightness | Menstrual Pain   | 0.004  | -0.002 | 0.010  | 0.003 | 1.40  | 0.87 | 1.6  | .208   | .266   | .011   |
| F7  | Brightness | Somatic Symptoms | -0.016 | -0.083 | 0.051  | 0.034 | 0.20  | 0.87 | 0.2  | .635   | .924   | .002   |
| F8  | Brightness | Intercept        | 0.450  | 0.309  | 0.590  | 0.071 | 29.75 | 0.74 | 40.0 | < .001 | < .001 | .219   |
| F8  | Brightness | Bladder Pain     | 0.003  | -0.006 | 0.013  | 0.005 | 0.37  | 0.74 | 0.5  | .484   | .985   | .003   |
| F8  | Brightness | Menstrual Pain   | 0.002  | -0.003 | 0.008  | 0.003 | 0.55  | 0.74 | 0.7  | .392   | .433   | .005   |
| F8  | Brightness | Somatic Symptoms | 0.006  | -0.056 | 0.067  | 0.031 | 0.03  | 0.74 | 0.0  | .85    | .934   | < .001 |
| FC1 | Brightness | Intercept        | 0.685  | 0.490  | 0.879  | 0.098 | 68.91 | 1.42 | 48.5 | < .001 | < .001 | .253   |
| FC1 | Brightness | Bladder Pain     | 0.007  | -0.006 | 0.020  | 0.007 | 1.62  | 1.42 | 1.1  | .288   | .985   | .008   |
| FC1 | Brightness | Menstrual Pain   | 0.008  | 0.001  | 0.016  | 0.004 | 6.40  | 1.42 | 4.5  | .036   | .126   | .031   |
| FC1 | Brightness | Somatic Symptoms | -0.006 | -0.091 | 0.079  | 0.043 | 0.03  | 1.42 | 0.0  | .886   | .934   | < .001 |
| FC2 | Brightness | Intercept        | 0.526  | 0.386  | 0.666  | 0.071 | 40.72 | 0.74 | 55.2 | < .001 | < .001 | .278   |
| FC2 | Brightness | Bladder Pain     | 0.003  | -0.007 | 0.012  | 0.005 | 0.22  | 0.74 | 0.3  | .585   | .985   | .002   |

|      |            |                  |        |        |        |       |       |      |      |        |        |        |
|------|------------|------------------|--------|--------|--------|-------|-------|------|------|--------|--------|--------|
| FC2  | Brightness | Menstrual Pain   | 0.003  | -0.002 | 0.009  | 0.003 | 1.08  | 0.74 | 1.5  | .228   | .278   | .01    |
| FC2  | Brightness | Somatic Symptoms | -0.010 | -0.071 | 0.052  | 0.031 | 0.07  | 0.74 | 0.1  | .756   | .934   | .001   |
| FC5  | Brightness | Intercept        | 0.479  | 0.349  | 0.608  | 0.065 | 33.69 | 0.63 | 53.6 | < .001 | < .001 | .273   |
| FC5  | Brightness | Bladder Pain     | 0.002  | -0.007 | 0.011  | 0.004 | 0.13  | 0.63 | 0.2  | .654   | .985   | .001   |
| FC5  | Brightness | Menstrual Pain   | 0.004  | -0.001 | 0.010  | 0.003 | 1.68  | 0.63 | 2.7  | .104   | .153   | .018   |
| FC5  | Brightness | Somatic Symptoms | -0.018 | -0.075 | 0.038  | 0.029 | 0.26  | 0.63 | 0.4  | .519   | .896   | .003   |
| FC6  | Brightness | Intercept        | 0.527  | 0.394  | 0.660  | 0.067 | 40.86 | 0.67 | 61.4 | < .001 | < .001 | .3     |
| FC6  | Brightness | Bladder Pain     | 0.001  | -0.008 | 0.010  | 0.005 | 0.05  | 0.67 | 0.1  | .789   | .985   | .001   |
| FC6  | Brightness | Menstrual Pain   | 0.002  | -0.004 | 0.007  | 0.003 | 0.22  | 0.67 | 0.3  | .565   | .583   | .002   |
| FC6  | Brightness | Somatic Symptoms | -0.016 | -0.074 | 0.042  | 0.029 | 0.20  | 0.67 | 0.3  | .588   | .896   | .002   |
| Fp1  | Brightness | Intercept        | 0.524  | 0.361  | 0.688  | 0.083 | 40.43 | 1.01 | 40.1 | < .001 | < .001 | .219   |
| Fp1  | Brightness | Bladder Pain     | 0.001  | -0.010 | 0.012  | 0.006 | 0.03  | 1.01 | 0.0  | .863   | .985   | < .001 |
| Fp1  | Brightness | Menstrual Pain   | 0.008  | 0.001  | 0.015  | 0.003 | 5.82  | 1.01 | 5.8  | .018   | .113   | .039   |
| Fp1  | Brightness | Somatic Symptoms | -0.072 | -0.144 | -0.001 | 0.036 | 4.01  | 1.01 | 4.0  | .048   | .514   | .027   |
| Fp2  | Brightness | Intercept        | 0.428  | 0.279  | 0.578  | 0.076 | 26.98 | 0.84 | 32.0 | < .001 | < .001 | .183   |
| Fp2  | Brightness | Bladder Pain     | 0.004  | -0.006 | 0.014  | 0.005 | 0.44  | 0.84 | 0.5  | .474   | .985   | .004   |
| Fp2  | Brightness | Menstrual Pain   | 0.004  | -0.002 | 0.010  | 0.003 | 1.76  | 0.84 | 2.1  | .151   | .211   | .014   |
| Fp2  | Brightness | Somatic Symptoms | -0.011 | -0.077 | 0.054  | 0.033 | 0.10  | 0.84 | 0.1  | .732   | .934   | .001   |
| FT10 | Brightness | Intercept        | 0.451  | 0.302  | 0.600  | 0.076 | 29.93 | 0.84 | 35.7 | < .001 | < .001 | .2     |
| FT10 | Brightness | Bladder Pain     | 0.005  | -0.005 | 0.015  | 0.005 | 0.87  | 0.84 | 1.0  | .31    | .985   | .007   |
| FT10 | Brightness | Menstrual Pain   | 0.005  | -0.001 | 0.011  | 0.003 | 2.29  | 0.84 | 2.7  | .1     | .153   | .019   |
| FT10 | Brightness | Somatic Symptoms | 0.002  | -0.063 | 0.067  | 0.033 | 0.00  | 0.84 | 0.0  | .955   | .955   | < .001 |
| FT9  | Brightness | Intercept        | 0.542  | 0.402  | 0.682  | 0.071 | 43.16 | 0.74 | 58.3 | < .001 | < .001 | .289   |
| FT9  | Brightness | Bladder Pain     | 0.003  | -0.006 | 0.013  | 0.005 | 0.32  | 0.74 | 0.4  | .512   | .985   | .003   |
| FT9  | Brightness | Menstrual Pain   | 0.006  | 0.000  | 0.012  | 0.003 | 3.20  | 0.74 | 4.3  | .039   | .126   | .029   |
| FT9  | Brightness | Somatic Symptoms | -0.046 | -0.107 | 0.015  | 0.031 | 1.64  | 0.74 | 2.2  | .139   | .58    | .015   |
| Fz   | Brightness | Intercept        | 0.515  | 0.373  | 0.657  | 0.072 | 39.02 | 0.76 | 51.5 | < .001 | < .001 | .265   |
| Fz   | Brightness | Bladder Pain     | 0.005  | -0.005 | 0.014  | 0.005 | 0.67  | 0.76 | 0.9  | .35    | .985   | .006   |
| Fz   | Brightness | Menstrual Pain   | 0.006  | 0.000  | 0.011  | 0.003 | 2.90  | 0.76 | 3.8  | .052   | .132   | .026   |
| Fz   | Brightness | Somatic Symptoms | -0.029 | -0.091 | 0.033  | 0.031 | 0.67  | 0.76 | 0.9  | .35    | .817   | .006   |
| O1   | Brightness | Intercept        | 0.459  | 0.301  | 0.618  | 0.080 | 31.03 | 0.95 | 32.7 | < .001 | < .001 | .186   |

|    |            |                  |        |        |        |       |       |      |      |        |        |        |
|----|------------|------------------|--------|--------|--------|-------|-------|------|------|--------|--------|--------|
| O1 | Brightness | Bladder Pain     | -0.001 | -0.011 | 0.010  | 0.005 | 0.01  | 0.95 | 0.0  | .905   | .985   | .      |
| O1 | Brightness | Menstrual Pain   | 0.008  | 0.002  | 0.015  | 0.003 | 6.42  | 0.95 | 6.8  | .01    | .109   | .045   |
| O1 | Brightness | Somatic Symptoms | -0.059 | -0.129 | 0.010  | 0.035 | 2.69  | 0.95 | 2.8  | .094   | .58    | .019   |
| O2 | Brightness | Intercept        | 0.410  | 0.258  | 0.562  | 0.077 | 24.69 | 0.87 | 28.4 | < .001 | < .001 | .166   |
| O2 | Brightness | Bladder Pain     | 0.005  | -0.005 | 0.016  | 0.005 | 0.94  | 0.87 | 1.1  | .3     | .985   | .008   |
| O2 | Brightness | Menstrual Pain   | 0.004  | -0.002 | 0.010  | 0.003 | 1.19  | 0.87 | 1.4  | .243   | .278   | .01    |
| O2 | Brightness | Somatic Symptoms | -0.031 | -0.097 | 0.036  | 0.034 | 0.74  | 0.87 | 0.8  | .359   | .817   | .006   |
| Oz | Brightness | Intercept        | 0.357  | 0.225  | 0.489  | 0.067 | 18.75 | 0.66 | 28.6 | < .001 | < .001 | .167   |
| Oz | Brightness | Bladder Pain     | -0.003 | -0.012 | 0.006  | 0.004 | 0.27  | 0.66 | 0.4  | .519   | .985   | .003   |
| Oz | Brightness | Menstrual Pain   | 0.006  | 0.001  | 0.011  | 0.003 | 3.32  | 0.66 | 5.1  | .026   | .118   | .034   |
| Oz | Brightness | Somatic Symptoms | -0.032 | -0.090 | 0.025  | 0.029 | 0.80  | 0.66 | 1.2  | .271   | .723   | .008   |
| P3 | Brightness | Intercept        | 0.453  | 0.305  | 0.601  | 0.075 | 30.18 | 0.82 | 36.7 | < .001 | < .001 | .204   |
| P3 | Brightness | Bladder Pain     | 0.000  | -0.010 | 0.010  | 0.005 | 0.01  | 0.82 | 0.0  | .933   | .985   | < .001 |
| P3 | Brightness | Menstrual Pain   | 0.006  | 0.000  | 0.012  | 0.003 | 3.22  | 0.82 | 3.9  | .05    | .132   | .027   |
| P3 | Brightness | Somatic Symptoms | -0.042 | -0.106 | 0.023  | 0.033 | 1.35  | 0.82 | 1.6  | .202   | .718   | .011   |
| P4 | Brightness | Intercept        | 0.481  | 0.345  | 0.616  | 0.069 | 34.01 | 0.69 | 49.2 | < .001 | < .001 | .256   |
| P4 | Brightness | Bladder Pain     | 0.006  | -0.003 | 0.015  | 0.005 | 1.24  | 0.69 | 1.8  | .182   | .985   | .012   |
| P4 | Brightness | Menstrual Pain   | 0.006  | 0.001  | 0.012  | 0.003 | 3.71  | 0.69 | 5.4  | .022   | .117   | .036   |
| P4 | Brightness | Somatic Symptoms | -0.044 | -0.103 | 0.015  | 0.030 | 1.48  | 0.69 | 2.1  | .145   | .58    | .015   |
| P7 | Brightness | Intercept        | 0.425  | 0.279  | 0.571  | 0.074 | 26.51 | 0.80 | 33.0 | < .001 | < .001 | .188   |
| P7 | Brightness | Bladder Pain     | -0.003 | -0.013 | 0.007  | 0.005 | 0.28  | 0.80 | 0.3  | .559   | .985   | .002   |
| P7 | Brightness | Menstrual Pain   | 0.008  | 0.002  | 0.014  | 0.003 | 6.34  | 0.80 | 7.9  | .006   | .09    | .052   |
| P7 | Brightness | Somatic Symptoms | -0.027 | -0.091 | 0.037  | 0.032 | 0.55  | 0.80 | 0.7  | .408   | .817   | .005   |
| P8 | Brightness | Intercept        | 0.437  | 0.298  | 0.576  | 0.070 | 28.11 | 0.73 | 38.6 | < .001 | < .001 | .213   |
| P8 | Brightness | Bladder Pain     | 0.003  | -0.006 | 0.012  | 0.005 | 0.29  | 0.73 | 0.4  | .525   | .985   | .003   |
| P8 | Brightness | Menstrual Pain   | 0.007  | 0.001  | 0.012  | 0.003 | 4.20  | 0.73 | 5.8  | .018   | .113   | .039   |
| P8 | Brightness | Somatic Symptoms | -0.078 | -0.139 | -0.017 | 0.031 | 4.68  | 0.73 | 6.4  | .012   | .197   | .043   |
| Pz | Brightness | Intercept        | 0.425  | 0.291  | 0.560  | 0.068 | 26.56 | 0.68 | 39.1 | < .001 | < .001 | .215   |
| Pz | Brightness | Bladder Pain     | 0.000  | -0.009 | 0.009  | 0.005 | 0.00  | 0.68 | 0.0  | .964   | .985   | < .001 |
| Pz | Brightness | Menstrual Pain   | 0.005  | 0.000  | 0.010  | 0.003 | 2.32  | 0.68 | 3.4  | .067   | .134   | .023   |
| Pz | Brightness | Somatic Symptoms | -0.017 | -0.076 | 0.042  | 0.030 | 0.22  | 0.68 | 0.3  | .568   | .896   | .002   |

|      |            |                  |        |        |        |       |       |      |      |        |        |        |
|------|------------|------------------|--------|--------|--------|-------|-------|------|------|--------|--------|--------|
| T7   | Brightness | Intercept        | 0.341  | 0.147  | 0.535  | 0.098 | 17.09 | 1.41 | 12.1 | .001   | .001   | .078   |
| T7   | Brightness | Bladder Pain     | 0.000  | -0.013 | 0.013  | 0.007 | 0.00  | 1.41 | 0.0  | .979   | .985   | < .001 |
| T7   | Brightness | Menstrual Pain   | 0.001  | -0.007 | 0.009  | 0.004 | 0.12  | 1.41 | 0.1  | .773   | .773   | .001   |
| T7   | Brightness | Somatic Symptoms | -0.007 | -0.091 | 0.078  | 0.043 | 0.03  | 1.41 | 0.0  | .877   | .934   | < .001 |
| T8   | Brightness | Intercept        | 0.459  | 0.312  | 0.605  | 0.074 | 30.94 | 0.81 | 38.4 | < .001 | < .001 | .211   |
| T8   | Brightness | Bladder Pain     | 0.004  | -0.006 | 0.013  | 0.005 | 0.41  | 0.81 | 0.5  | .478   | .985   | .004   |
| T8   | Brightness | Menstrual Pain   | 0.006  | 0.000  | 0.011  | 0.003 | 2.75  | 0.81 | 3.4  | .067   | .134   | .023   |
| T8   | Brightness | Somatic Symptoms | 0.009  | -0.055 | 0.073  | 0.032 | 0.06  | 0.81 | 0.1  | .779   | .934   | .001   |
| TP10 | Brightness | Intercept        | 0.410  | 0.261  | 0.558  | 0.075 | 24.67 | 0.83 | 29.7 | < .001 | < .001 | .172   |
| TP10 | Brightness | Bladder Pain     | 0.004  | -0.006 | 0.014  | 0.005 | 0.53  | 0.83 | 0.6  | .427   | .985   | .004   |
| TP10 | Brightness | Menstrual Pain   | 0.002  | -0.004 | 0.008  | 0.003 | 0.40  | 0.83 | 0.5  | .49    | .523   | .003   |
| TP10 | Brightness | Somatic Symptoms | 0.004  | -0.061 | 0.069  | 0.033 | 0.01  | 0.83 | 0.0  | .905   | .934   | < .001 |
| TP9  | Brightness | Intercept        | 0.617  | 0.375  | 0.860  | 0.123 | 56.05 | 2.22 | 25.3 | < .001 | < .001 | .15    |
| TP9  | Brightness | Bladder Pain     | 0.007  | -0.009 | 0.023  | 0.008 | 1.59  | 2.22 | 0.7  | .398   | .985   | .005   |
| TP9  | Brightness | Menstrual Pain   | 0.008  | -0.002 | 0.018  | 0.005 | 6.17  | 2.22 | 2.8  | .097   | .153   | .019   |
| TP9  | Brightness | Somatic Symptoms | -0.061 | -0.167 | 0.045  | 0.054 | 2.85  | 2.22 | 1.3  | .258   | .723   | .009   |
| C3   | PSD        | Intercept        | 0.010  | -0.156 | 0.175  | 0.084 | 0.01  | 1.03 | 0.0  | .91    | .945   | < .001 |
| C3   | PSD        | Bladder Pain     | 0.001  | -0.010 | 0.012  | 0.006 | 0.05  | 1.03 | 0.1  | .819   | .974   | < .001 |
| C3   | PSD        | Menstrual Pain   | 0.000  | -0.007 | 0.006  | 0.003 | 0.02  | 1.03 | 0.0  | .89    | .968   | < .001 |
| C3   | PSD        | Somatic Symptoms | -0.023 | -0.096 | 0.049  | 0.037 | 0.42  | 1.03 | 0.4  | .522   | .93    | .003   |
| C4   | PSD        | Intercept        | 0.225  | 0.079  | 0.370  | 0.074 | 7.42  | 0.80 | 9.3  | .003   | .021   | .061   |
| C4   | PSD        | Bladder Pain     | 0.009  | -0.001 | 0.019  | 0.005 | 2.54  | 0.80 | 3.2  | .076   | .796   | .022   |
| C4   | PSD        | Menstrual Pain   | 0.002  | -0.004 | 0.008  | 0.003 | 0.34  | 0.80 | 0.4  | .516   | .968   | .003   |
| C4   | PSD        | Somatic Symptoms | -0.022 | -0.086 | 0.041  | 0.032 | 0.38  | 0.80 | 0.5  | .491   | .93    | .003   |
| CP1  | PSD        | Intercept        | 0.041  | -0.166 | 0.248  | 0.105 | 0.25  | 1.62 | 0.2  | .697   | .779   | .001   |
| CP1  | PSD        | Bladder Pain     | -0.011 | -0.025 | 0.003  | 0.007 | 3.63  | 1.62 | 2.2  | .137   | .796   | .015   |
| CP1  | PSD        | Menstrual Pain   | 0.003  | -0.005 | 0.012  | 0.004 | 1.09  | 1.62 | 0.7  | .412   | .968   | .005   |
| CP1  | PSD        | Somatic Symptoms | -0.140 | -0.231 | -0.050 | 0.046 | 15.13 | 1.62 | 9.4  | .003   | .043   | .061   |
| CP2  | PSD        | Intercept        | 0.047  | -0.117 | 0.211  | 0.083 | 0.33  | 1.01 | 0.3  | .569   | .701   | .002   |
| CP2  | PSD        | Bladder Pain     | 0.005  | -0.006 | 0.016  | 0.006 | 0.72  | 1.01 | 0.7  | .4     | .916   | .005   |
| CP2  | PSD        | Menstrual Pain   | -0.005 | -0.012 | 0.001  | 0.003 | 2.73  | 1.01 | 2.7  | .103   | .968   | .019   |

|     |     |                  |        |        |       |       |      |      |      |        |      |        |
|-----|-----|------------------|--------|--------|-------|-------|------|------|------|--------|------|--------|
| CP2 | PSD | Somatic Symptoms | 0.051  | -0.021 | 0.122 | 0.036 | 1.97 | 1.01 | 1.9  | .165   | .794 | .013   |
| CP5 | PSD | Intercept        | 0.125  | -0.024 | 0.274 | 0.076 | 2.29 | 0.84 | 2.7  | .1     | .268 | .019   |
| CP5 | PSD | Bladder Pain     | 0.001  | -0.009 | 0.011 | 0.005 | 0.01 | 0.84 | 0.0  | .909   | .974 | < .001 |
| CP5 | PSD | Menstrual Pain   | 0.001  | -0.005 | 0.007 | 0.003 | 0.03 | 0.84 | 0.0  | .858   | .968 | < .001 |
| CP5 | PSD | Somatic Symptoms | -0.035 | -0.100 | 0.031 | 0.033 | 0.92 | 0.84 | 1.1  | .297   | .794 | .008   |
| CP6 | PSD | Intercept        | 0.202  | 0.091  | 0.314 | 0.056 | 6.01 | 0.47 | 12.9 | < .001 | .012 | .083   |
| CP6 | PSD | Bladder Pain     | -0.001 | -0.009 | 0.006 | 0.004 | 0.05 | 0.47 | 0.1  | .741   | .974 | .001   |
| CP6 | PSD | Menstrual Pain   | 0.000  | -0.005 | 0.004 | 0.002 | 0.00 | 0.47 | 0.0  | .968   | .968 | < .001 |
| CP6 | PSD | Somatic Symptoms | 0.088  | 0.040  | 0.137 | 0.025 | 5.99 | 0.47 | 12.8 | < .001 | .015 | .082   |
| Cz  | PSD | Intercept        | 0.062  | -0.091 | 0.215 | 0.077 | 0.57 | 0.88 | 0.6  | .423   | .618 | .005   |
| Cz  | PSD | Bladder Pain     | 0.006  | -0.004 | 0.017 | 0.005 | 1.31 | 0.88 | 1.5  | .225   | .796 | .01    |
| Cz  | PSD | Menstrual Pain   | 0.000  | -0.006 | 0.006 | 0.003 | 0.00 | 0.88 | 0.0  | .948   | .968 | < .001 |
| Cz  | PSD | Somatic Symptoms | 0.009  | -0.058 | 0.076 | 0.034 | 0.06 | 0.88 | 0.1  | .79    | .931 | < .001 |
| F3  | PSD | Intercept        | 0.039  | -0.146 | 0.224 | 0.094 | 0.22 | 1.29 | 0.2  | .68    | .779 | .001   |
| F3  | PSD | Bladder Pain     | 0.001  | -0.011 | 0.014 | 0.006 | 0.05 | 1.29 | 0.0  | .849   | .974 | < .001 |
| F3  | PSD | Menstrual Pain   | 0.001  | -0.007 | 0.008 | 0.004 | 0.03 | 1.29 | 0.0  | .88    | .968 | < .001 |
| F3  | PSD | Somatic Symptoms | -0.053 | -0.134 | 0.028 | 0.041 | 2.15 | 1.29 | 1.7  | .199   | .794 | .012   |
| F4  | PSD | Intercept        | 0.176  | -0.024 | 0.376 | 0.101 | 4.57 | 1.50 | 3.0  | .083   | .242 | .021   |
| F4  | PSD | Bladder Pain     | -0.001 | -0.015 | 0.012 | 0.007 | 0.05 | 1.50 | 0.0  | .856   | .974 | < .001 |
| F4  | PSD | Menstrual Pain   | -0.002 | -0.010 | 0.006 | 0.004 | 0.43 | 1.50 | 0.3  | .594   | .968 | .002   |
| F4  | PSD | Somatic Symptoms | -0.017 | -0.104 | 0.070 | 0.044 | 0.22 | 1.50 | 0.1  | .7     | .931 | .001   |
| F7  | PSD | Intercept        | 0.150  | -0.044 | 0.343 | 0.098 | 3.29 | 1.41 | 2.3  | .129   | .283 | .016   |
| F7  | PSD | Bladder Pain     | 0.003  | -0.010 | 0.016 | 0.007 | 0.22 | 1.41 | 0.2  | .692   | .974 | .001   |
| F7  | PSD | Menstrual Pain   | -0.001 | -0.008 | 0.007 | 0.004 | 0.03 | 1.41 | 0.0  | .893   | .968 | < .001 |
| F7  | PSD | Somatic Symptoms | -0.003 | -0.088 | 0.081 | 0.043 | 0.01 | 1.41 | 0.0  | .941   | .941 | < .001 |
| F8  | PSD | Intercept        | 0.195  | 0.019  | 0.371 | 0.089 | 5.61 | 1.17 | 4.8  | .03    | .16  | .033   |
| F8  | PSD | Bladder Pain     | 0.002  | -0.010 | 0.014 | 0.006 | 0.10 | 1.17 | 0.1  | .767   | .974 | .001   |
| F8  | PSD | Menstrual Pain   | 0.002  | -0.005 | 0.009 | 0.004 | 0.25 | 1.17 | 0.2  | .642   | .968 | .002   |
| F8  | PSD | Somatic Symptoms | -0.042 | -0.119 | 0.035 | 0.039 | 1.34 | 1.17 | 1.2  | .285   | .794 | .008   |
| FC1 | PSD | Intercept        | -0.210 | -0.594 | 0.173 | 0.194 | 6.50 | 5.54 | 1.2  | .28    | .472 | .008   |
| FC1 | PSD | Bladder Pain     | -0.017 | -0.043 | 0.008 | 0.013 | 9.89 | 5.54 | 1.8  | .184   | .796 | .012   |

|      |     |                  |        |        |       |       |      |      |     |      |      |        |
|------|-----|------------------|--------|--------|-------|-------|------|------|-----|------|------|--------|
| FC1  | PSD | Menstrual Pain   | -0.007 | -0.022 | 0.009 | 0.008 | 4.08 | 5.54 | 0.7 | .392 | .968 | .005   |
| FC1  | PSD | Somatic Symptoms | 0.042  | -0.126 | 0.210 | 0.085 | 1.36 | 5.54 | 0.2 | .62  | .931 | .002   |
| FC2  | PSD | Intercept        | 0.119  | -0.070 | 0.308 | 0.096 | 2.09 | 1.35 | 1.6 | .215 | .404 | .011   |
| FC2  | PSD | Bladder Pain     | -0.007 | -0.020 | 0.005 | 0.006 | 1.80 | 1.35 | 1.3 | .249 | .796 | .009   |
| FC2  | PSD | Menstrual Pain   | 0.004  | -0.003 | 0.012 | 0.004 | 1.66 | 1.35 | 1.2 | .268 | .968 | .009   |
| FC2  | PSD | Somatic Symptoms | -0.035 | -0.117 | 0.048 | 0.042 | 0.93 | 1.35 | 0.7 | .407 | .868 | .005   |
| FC5  | PSD | Intercept        | -0.006 | -0.172 | 0.160 | 0.084 | 0.00 | 1.04 | 0.0 | .945 | .945 | < .001 |
| FC5  | PSD | Bladder Pain     | -0.007 | -0.018 | 0.005 | 0.006 | 1.44 | 1.04 | 1.4 | .241 | .796 | .01    |
| FC5  | PSD | Menstrual Pain   | 0.004  | -0.002 | 0.011 | 0.003 | 1.80 | 1.04 | 1.7 | .189 | .968 | .012   |
| FC5  | PSD | Somatic Symptoms | -0.010 | -0.083 | 0.062 | 0.037 | 0.08 | 1.04 | 0.1 | .782 | .931 | .001   |
| FC6  | PSD | Intercept        | 0.008  | -0.162 | 0.179 | 0.086 | 0.01 | 1.09 | 0.0 | .924 | .945 | < .001 |
| FC6  | PSD | Bladder Pain     | 0.010  | -0.001 | 0.022 | 0.006 | 3.51 | 1.09 | 3.2 | .075 | .796 | .022   |
| FC6  | PSD | Menstrual Pain   | 0.001  | -0.006 | 0.008 | 0.003 | 0.15 | 1.09 | 0.1 | .716 | .968 | .001   |
| FC6  | PSD | Somatic Symptoms | 0.007  | -0.068 | 0.082 | 0.038 | 0.04 | 1.09 | 0.0 | .853 | .931 | < .001 |
| Fp1  | PSD | Intercept        | 0.035  | -0.150 | 0.221 | 0.094 | 0.18 | 1.29 | 0.1 | .706 | .779 | .001   |
| Fp1  | PSD | Bladder Pain     | 0.006  | -0.007 | 0.018 | 0.006 | 1.00 | 1.29 | 0.8 | .381 | .916 | .005   |
| Fp1  | PSD | Menstrual Pain   | -0.001 | -0.008 | 0.007 | 0.004 | 0.03 | 1.29 | 0.0 | .887 | .968 | < .001 |
| Fp1  | PSD | Somatic Symptoms | 0.054  | -0.027 | 0.135 | 0.041 | 2.26 | 1.29 | 1.8 | .188 | .794 | .012   |
| Fp2  | PSD | Intercept        | 0.092  | -0.141 | 0.325 | 0.118 | 1.25 | 2.04 | 0.6 | .435 | .618 | .004   |
| Fp2  | PSD | Bladder Pain     | 0.004  | -0.011 | 0.020 | 0.008 | 0.59 | 2.04 | 0.3 | .593 | .974 | .002   |
| Fp2  | PSD | Menstrual Pain   | 0.001  | -0.009 | 0.010 | 0.005 | 0.05 | 2.04 | 0.0 | .874 | .968 | < .001 |
| Fp2  | PSD | Somatic Symptoms | -0.060 | -0.161 | 0.042 | 0.052 | 2.74 | 2.04 | 1.3 | .249 | .794 | .009   |
| FT10 | PSD | Intercept        | 0.152  | -0.010 | 0.315 | 0.082 | 3.42 | 0.99 | 3.5 | .065 | .236 | .024   |
| FT10 | PSD | Bladder Pain     | -0.005 | -0.016 | 0.006 | 0.006 | 0.83 | 0.99 | 0.8 | .361 | .916 | .006   |
| FT10 | PSD | Menstrual Pain   | 0.001  | -0.006 | 0.007 | 0.003 | 0.04 | 0.99 | 0.0 | .833 | .968 | < .001 |
| FT10 | PSD | Somatic Symptoms | -0.037 | -0.108 | 0.034 | 0.036 | 1.07 | 0.99 | 1.1 | .299 | .794 | .008   |
| FT9  | PSD | Intercept        | 0.067  | -0.146 | 0.279 | 0.108 | 0.65 | 1.70 | 0.4 | .536 | .701 | .003   |
| FT9  | PSD | Bladder Pain     | 0.003  | -0.012 | 0.017 | 0.007 | 0.24 | 1.70 | 0.1 | .706 | .974 | .001   |
| FT9  | PSD | Menstrual Pain   | -0.002 | -0.010 | 0.007 | 0.004 | 0.34 | 1.70 | 0.2 | .657 | .968 | .001   |
| FT9  | PSD | Somatic Symptoms | 0.080  | -0.013 | 0.172 | 0.047 | 4.87 | 1.70 | 2.9 | .093 | .794 | .02    |
| Fz   | PSD | Intercept        | 0.086  | -0.128 | 0.300 | 0.108 | 1.08 | 1.72 | 0.6 | .428 | .618 | .004   |

|    |     |                  |        |        |       |       |      |      |      |      |      |        |
|----|-----|------------------|--------|--------|-------|-------|------|------|------|------|------|--------|
| Fz | PSD | Bladder Pain     | -0.005 | -0.019 | 0.009 | 0.007 | 0.84 | 1.72 | 0.5  | .486 | .973 | .003   |
| Fz | PSD | Menstrual Pain   | -0.001 | -0.009 | 0.008 | 0.004 | 0.06 | 1.72 | 0.0  | .852 | .968 | < .001 |
| Fz | PSD | Somatic Symptoms | -0.006 | -0.099 | 0.088 | 0.047 | 0.03 | 1.72 | 0.0  | .902 | .931 | < .001 |
| O1 | PSD | Intercept        | 0.089  | -0.045 | 0.222 | 0.067 | 1.15 | 0.67 | 1.7  | .192 | .383 | .012   |
| O1 | PSD | Bladder Pain     | 0.007  | -0.002 | 0.016 | 0.005 | 1.50 | 0.67 | 2.2  | .137 | .796 | .015   |
| O1 | PSD | Menstrual Pain   | -0.005 | -0.010 | 0.001 | 0.003 | 2.05 | 0.67 | 3.1  | .082 | .968 | .021   |
| O1 | PSD | Somatic Symptoms | 0.006  | -0.052 | 0.064 | 0.029 | 0.03 | 0.67 | 0.0  | .838 | .931 | < .001 |
| O2 | PSD | Intercept        | 0.075  | -0.057 | 0.207 | 0.067 | 0.83 | 0.65 | 1.3  | .262 | .466 | .009   |
| O2 | PSD | Bladder Pain     | -0.006 | -0.014 | 0.003 | 0.004 | 0.99 | 0.65 | 1.5  | .22  | .796 | .01    |
| O2 | PSD | Menstrual Pain   | 0.001  | -0.004 | 0.007 | 0.003 | 0.14 | 0.65 | 0.2  | .643 | .968 | .002   |
| O2 | PSD | Somatic Symptoms | -0.006 | -0.064 | 0.051 | 0.029 | 0.03 | 0.65 | 0.0  | .827 | .931 | < .001 |
| Oz | PSD | Intercept        | 0.107  | 0.040  | 0.174 | 0.034 | 1.68 | 0.17 | 9.9  | .002 | .021 | .065   |
| Oz | PSD | Bladder Pain     | 0.005  | 0.001  | 0.010 | 0.002 | 0.83 | 0.17 | 4.9  | .029 | .796 | .033   |
| Oz | PSD | Menstrual Pain   | -0.001 | -0.004 | 0.002 | 0.001 | 0.12 | 0.17 | 0.7  | .404 | .968 | .005   |
| Oz | PSD | Somatic Symptoms | -0.005 | -0.034 | 0.025 | 0.015 | 0.02 | 0.17 | 0.1  | .75  | .931 | .001   |
| P3 | PSD | Intercept        | 0.100  | -0.012 | 0.212 | 0.057 | 1.46 | 0.47 | 3.1  | .081 | .242 | .021   |
| P3 | PSD | Bladder Pain     | 0.001  | -0.007 | 0.008 | 0.004 | 0.02 | 0.47 | 0.1  | .821 | .974 | < .001 |
| P3 | PSD | Menstrual Pain   | 0.003  | -0.001 | 0.008 | 0.002 | 0.85 | 0.47 | 1.8  | .182 | .968 | .012   |
| P3 | PSD | Somatic Symptoms | -0.028 | -0.077 | 0.021 | 0.025 | 0.61 | 0.47 | 1.3  | .26  | .794 | .009   |
| P4 | PSD | Intercept        | 0.083  | -0.025 | 0.192 | 0.055 | 1.01 | 0.44 | 2.3  | .132 | .283 | .016   |
| P4 | PSD | Bladder Pain     | -0.002 | -0.009 | 0.005 | 0.004 | 0.11 | 0.44 | 0.3  | .615 | .974 | .002   |
| P4 | PSD | Menstrual Pain   | -0.003 | -0.007 | 0.002 | 0.002 | 0.64 | 0.44 | 1.4  | .231 | .968 | .01    |
| P4 | PSD | Somatic Symptoms | 0.007  | -0.041 | 0.054 | 0.024 | 0.03 | 0.44 | 0.1  | .782 | .931 | .001   |
| P7 | PSD | Intercept        | 0.117  | -0.001 | 0.235 | 0.060 | 2.02 | 0.52 | 3.9  | .051 | .235 | .026   |
| P7 | PSD | Bladder Pain     | 0.003  | -0.005 | 0.011 | 0.004 | 0.37 | 0.52 | 0.7  | .401 | .916 | .005   |
| P7 | PSD | Menstrual Pain   | -0.003 | -0.008 | 0.002 | 0.002 | 0.83 | 0.52 | 1.6  | .208 | .968 | .011   |
| P7 | PSD | Somatic Symptoms | 0.026  | -0.026 | 0.077 | 0.026 | 0.51 | 0.52 | 1.0  | .323 | .794 | .007   |
| P8 | PSD | Intercept        | 0.199  | 0.085  | 0.313 | 0.058 | 5.84 | 0.49 | 11.9 | .001 | .012 | .077   |
| P8 | PSD | Bladder Pain     | 0.000  | -0.008 | 0.008 | 0.004 | 0.00 | 0.49 | 0.0  | .974 | .974 | < .001 |
| P8 | PSD | Menstrual Pain   | 0.001  | -0.004 | 0.005 | 0.002 | 0.03 | 0.49 | 0.1  | .814 | .968 | < .001 |
| P8 | PSD | Somatic Symptoms | 0.021  | -0.029 | 0.071 | 0.025 | 0.34 | 0.49 | 0.7  | .405 | .868 | .005   |

|      |     |                  |        |        |       |       |      |      |     |      |      |        |
|------|-----|------------------|--------|--------|-------|-------|------|------|-----|------|------|--------|
| Pz   | PSD | Intercept        | 0.156  | 0.053  | 0.260 | 0.052 | 3.60 | 0.40 | 9.0 | .003 | .021 | .059   |
| Pz   | PSD | Bladder Pain     | 0.002  | -0.005 | 0.009 | 0.004 | 0.17 | 0.40 | 0.4 | .518 | .974 | .003   |
| Pz   | PSD | Menstrual Pain   | 0.003  | -0.001 | 0.007 | 0.002 | 0.69 | 0.40 | 1.7 | .192 | .968 | .012   |
| Pz   | PSD | Somatic Symptoms | -0.015 | -0.060 | 0.030 | 0.023 | 0.16 | 0.40 | 0.4 | .523 | .93  | .003   |
| T7   | PSD | Intercept        | 0.258  | -0.018 | 0.534 | 0.140 | 9.79 | 2.86 | 3.4 | .066 | .236 | .023   |
| T7   | PSD | Bladder Pain     | -0.003 | -0.022 | 0.015 | 0.009 | 0.38 | 2.86 | 0.1 | .718 | .974 | .001   |
| T7   | PSD | Menstrual Pain   | 0.005  | -0.006 | 0.016 | 0.006 | 2.08 | 2.86 | 0.7 | .395 | .968 | .005   |
| T7   | PSD | Somatic Symptoms | -0.024 | -0.145 | 0.096 | 0.061 | 0.45 | 2.86 | 0.2 | .693 | .931 | .001   |
| T8   | PSD | Intercept        | 0.050  | -0.120 | 0.220 | 0.086 | 0.37 | 1.08 | 0.3 | .562 | .701 | .002   |
| T8   | PSD | Bladder Pain     | -0.004 | -0.016 | 0.007 | 0.006 | 0.61 | 1.08 | 0.6 | .455 | .97  | .004   |
| T8   | PSD | Menstrual Pain   | 0.000  | -0.007 | 0.007 | 0.003 | 0.00 | 1.08 | 0.0 | .964 | .968 | < .001 |
| T8   | PSD | Somatic Symptoms | -0.052 | -0.126 | 0.022 | 0.038 | 2.08 | 1.08 | 1.9 | .168 | .794 | .013   |
| TP10 | PSD | Intercept        | 0.098  | -0.026 | 0.222 | 0.063 | 1.41 | 0.58 | 2.4 | .122 | .283 | .017   |
| TP10 | PSD | Bladder Pain     | 0.000  | -0.008 | 0.009 | 0.004 | 0.00 | 0.58 | 0.0 | .934 | .974 | < .001 |
| TP10 | PSD | Menstrual Pain   | 0.001  | -0.004 | 0.006 | 0.003 | 0.14 | 0.58 | 0.2 | .625 | .968 | .002   |
| TP10 | PSD | Somatic Symptoms | -0.004 | -0.058 | 0.050 | 0.027 | 0.01 | 0.58 | 0.0 | .881 | .931 | < .001 |
| TP9  | PSD | Intercept        | -0.072 | -0.257 | 0.113 | 0.094 | 0.76 | 1.29 | 0.6 | .444 | .618 | .004   |
| TP9  | PSD | Bladder Pain     | 0.000  | -0.012 | 0.013 | 0.006 | 0.00 | 1.29 | 0.0 | .956 | .974 | < .001 |
| TP9  | PSD | Menstrual Pain   | -0.003 | -0.010 | 0.005 | 0.004 | 0.76 | 1.29 | 0.6 | .443 | .968 | .004   |
| TP9  | PSD | Somatic Symptoms | 0.007  | -0.074 | 0.087 | 0.041 | 0.03 | 1.29 | 0.0 | .874 | .931 | < .001 |

*Note.* Results for the Intercept model are equivalent across all electrodes and are therefore not presented for each individual electrode; *df* for the numerator and denominator were 1 and 143, respectively; LL = lower level; UL = upper level.
